# Supplementary material for: Influence of Binder Composition and Material Extrusion (MEX) Parameters on the 3D Printing of Highly Filled Copper Feedstocks
Source: MDPI journal article supplement (doi:10.3390/polym14224962), 2022-11-16
Supplement: s1 [file s1]

# Influence of binder composition and material extrusion (MEX) parameters on the 3D printing of highly filled copper feedstocks

Mahrukh Sadaf <sup>1,2\*</sup>, Santiago Cano <sup>3\*</sup>, Joamin Gonzalez-Gutierrez <sup>3,4\*</sup>, Mario Bragaglia <sup>1</sup>, Stephan Schuschnigg <sup>3</sup>, Christian Kukla <sup>5</sup>, Clemens Holzer <sup>3</sup>, Lilla Vály <sup>6</sup>, Michael Kitzmantel <sup>6</sup> and Francesca Nanni <sup>1</sup>

<sup>1</sup> University of Rome “Tor Vergata”, Department of Enterprise Engineering “Mario Lucertini”, and INSTM RU Roma-Tor Vergata, via del Politecnico 1, 00133 Rome, Italy

<sup>2</sup> University of Ljubljana, Faculty for Mechanical Engineering, Laboratory of Experimental Mechanics, Ljubljana, Aškerčeva Ulica 6, 1000 Ljubljana, Slovenia

<sup>3</sup> Montanuniversitaet Leoben, Institute of Polymer Processing, Otto Gloeckel-Straße 2, 8700 Leoben, Austria

<sup>4</sup> Luxembourg Institute of Science and Technology, Material Research and Technology Department, Functional Polymers Research Unit, 5, rue Bommel, L-4940 Hautcharage, Luxembourg

<sup>5</sup> Montanuniversitaet Leoben, Industrial Liaison Department, Peter-Tunnerstraße 27, 8700 Leoben, Austria

<sup>6</sup> RHP-Technology GmbH, Austrian Research Center, 2444 Seibersdorf, Austria

\* Correspondence: mahrukh.sadaf@fs.uni-lj.si (M.S.); santiago.cano@outlook.es (S.C.); joamin.gonzalez-gutierrez@list.lu (J.G.-G.)

## Supplementary Materials

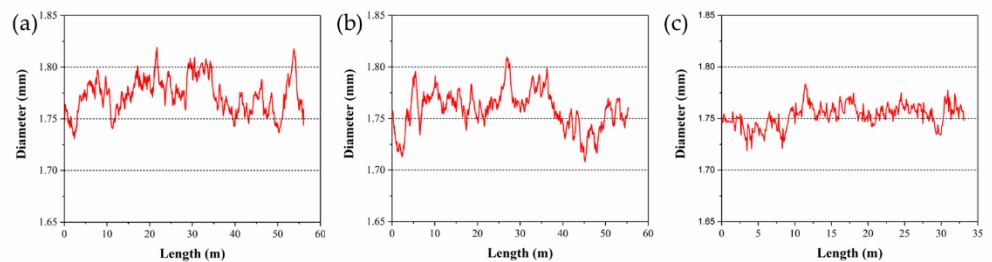

**Figure S1.** The diameter of the filaments spool used in the manufacturing of the MEX specimens: **(a)** Feedstock F1\_ST; **(b)** Feedstock F2\_ST; **(c)** Feedstock F3\_T.

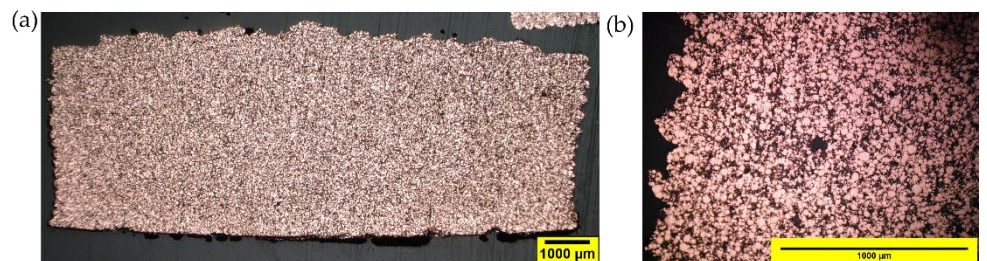

**Figure S2.** F2\_ST MEX bending specimens produced at 10 mm s<sup>-1</sup>: With a magnification of **(a)** 20x; **(b)** 200x.
